# Supplementary material for: The Association of Physical (in)Activity with Mental Health. Differences between Elder and Younger Populations: A Systematic Literature Review
Source: MDPI journal article supplement (doi:10.3390/ijerph18094771), 2021-04-29
Supplement: s1 [file s1]

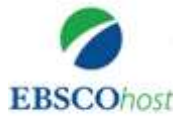

Friday, December 11, 2020 7:05:35 AM

| #   | Query                                                                                                                                                                      | Limiters/Expanders                                                                                        | Last Run Via                                                                                         | Results |
|-----|----------------------------------------------------------------------------------------------------------------------------------------------------------------------------|-----------------------------------------------------------------------------------------------------------|------------------------------------------------------------------------------------------------------|---------|
| S12 | ((S1 OR S2) AND (S3 OR S4) AND (S5 OR S6)) NOT (S7 OR S8)                                                                                                                  | Limiters - Linked Full Text; Published Date: 20000101-20201231<br>Search modes - Find all my search terms | Interface - EBSCOhost<br>Research Databases<br>Search Screen - Advanced Search<br>Database - EconLit | 13      |
| S11 | ((S1 OR S2) AND (S3 OR S4) AND (S5 OR S6)) NOT (S7 OR S8)                                                                                                                  | Limiters - Published Date: 20000101-20201231<br>Search modes - Find all my search terms                   | Interface - EBSCOhost<br>Research Databases<br>Search Screen - Advanced Search<br>Database - EconLit | 51      |
| S10 | ((S1 OR S2) AND (S3 OR S4) AND (S5 OR S6)) NOT (S7 OR S8)                                                                                                                  | Expanders - Apply equivalent subjects<br>Search modes - Find all my search terms                          | Interface - EBSCOhost<br>Research Databases<br>Search Screen - Advanced Search<br>Database - EconLit | 53      |
| S9  | (AB (descriptive analys* OR ANOVA OR correlations measures)) AND (S1 AND S3 AND S5)                                                                                        | Expanders - Apply equivalent subjects<br>Search modes - Find all my search terms                          | Interface - EBSCOhost<br>Research Databases<br>Search Screen - Advanced Search<br>Database - EconLit | 0       |
| S8  | AB (descriptive analys* OR ANOVA OR correlations measures)                                                                                                                 | Expanders - Apply equivalent subjects<br>Search modes - Find all my search terms                          | Interface - EBSCOhost<br>Research Databases<br>Search Screen - Advanced Search<br>Database - EconLit | 7,238   |
| S7  | TI (descriptive analys* OR ANOVA OR correlations measures)                                                                                                                 | Expanders - Apply equivalent subjects<br>Search modes - Find all my search terms                          | Interface - EBSCOhost<br>Research Databases<br>Search Screen - Advanced Search<br>Database - EconLit | 170     |
| S6  | AB Quantitative studies OR quantitative analys* OR regression OR econometric* OR association OR cross-section* OR longitudinal analys* OR panel data analys* OR causality* | Expanders - Apply equivalent subjects<br>Search modes - Find all my search terms                          | Interface - EBSCOhost<br>Research Databases<br>Search Screen - Advanced Search<br>Database - EconLit | 118,129 |

|    |                                                                                                                                                                                                  |                                                                                        |                                                                                                         |        |
|----|--------------------------------------------------------------------------------------------------------------------------------------------------------------------------------------------------|----------------------------------------------------------------------------------------|---------------------------------------------------------------------------------------------------------|--------|
| S5 | TI Quantitative studies<br>OR quantitative analys*<br>OR regression OR<br>econometric* OR<br>association OR cross-<br>section* OR longitudinal<br>analys* OR panel data<br>analys* OR causality* | Expanders - Apply<br>equivalent subjects<br>Search modes - Find all<br>my search terms | Interface - EBSCOhost<br>Research Databases<br>Search Screen - Advanced<br>Search<br>Database - EconLit | 26,302 |
| S4 | AB Physical activity OR<br>physical inactivity OR<br>Physical exertion OR<br>exercise OR physical<br>exercise OR sport OR<br>physical education                                                  | Expanders - Apply<br>equivalent subjects<br>Search modes - Find all<br>my search terms | Interface - EBSCOhost<br>Research Databases<br>Search Screen - Advanced<br>Search<br>Database - EconLit | 14,767 |
| S3 | TI Physical activity OR<br>physical inactivity OR<br>Physical exertion OR<br>exercise OR physical<br>exercise OR sport OR<br>physical education                                                  | Expanders - Apply<br>equivalent subjects<br>Search modes - Find all<br>my search terms | Interface - EBSCOhost<br>Research Databases<br>Search Screen - Advanced<br>Search<br>Database - EconLit | 2,623  |
| S2 | AB Mental health OR<br>Mental disorder* OR<br>depress* OR anxiety OR<br>psychiatr*                                                                                                               | Expanders - Apply<br>equivalent subjects<br>Search modes - Find all<br>my search terms | Interface - EBSCOhost<br>Research Databases<br>Search Screen - Advanced<br>Search<br>Database - EconLit | 8,225  |
| S1 | TI Mental health OR<br>Mental disorder* OR<br>depress* OR anxiety OR<br>psychiatr*                                                                                                               | Expanders - Apply<br>equivalent subjects<br>Search modes - Find all<br>my search terms | Interface - EBSCOhost<br>Research Databases<br>Search Screen - Advanced<br>Search<br>Database - EconLit | 3,205  |
